RUNNING HEAD: Gaze dynamics of feature-based inhibition

1  
2  
3  
4  
5  
6  
7  
8  
9  
10

# **Gaze dynamics of feature-based distractor inhibition under the prior-knowledge and expectation**

Wen Wen<sup>1</sup>, Yangming Zhang<sup>1</sup>, Sheng Li<sup>1,2,3</sup>

1. School of Psychological and Cognitive Sciences and Beijing Key Laboratory of Behavior and Mental Health, Peking University, Beijing, China
2. PKU-IDG/McGovern Institute for Brain Research, Peking University, Beijing, China
3. Key Laboratory of Machine Perception (Ministry of Education), Peking University, Beijing, China

## Gaze dynamics of feature-based inhibition

### 11 **Abstract**

12 Prior information about distractor facilitates selective attention to task-relevant items and  
13 helps the optimization of oculomotor planning. Particularly, feature-based attentional  
14 inhibition could be benefited from the pre-knowledge of critical features of the distractors. In  
15 the present study, we capitalized on gaze-position decoding to examine the dynamics of  
16 attentional deployment in a feature-based attentional task that involved two groups of dots  
17 (target/distractor dots) moving toward different directions. Specifically, this measurement  
18 revealed how pre-knowledge of the target's or distractor's direction modulated real-time  
19 feature-based attentional bias. In Experiment 1, participants were provided with target cues  
20 indicating the moving direction of target dots. The results showed that participants were biased  
21 towards the cued direction and tracked the target dots throughout the task period. In Experiment  
22 2 and Experiment 3, participants were provided with cues that informed the moving direction  
23 of distractor dots. The results showed that participants would continuously monitor the  
24 distractor's direction when the distractor cue varied on a trial-by-trial basis (Experiment 2).  
25 However, when the to-be-ignored distractor direction remained constant (Experiment 3),  
26 participants would strategically bias their attention to the distractor's direction before the cue  
27 onset and reduce the cost of re-deployment of attention between trials. These results suggest  
28 that monitoring the distractor's feature is a prerequisite for feature-based attentional inhibition  
29 and this process is facilitated by the predictability of the distractor's feature.

30 **Keywords: feature-based attention, suppression, expectation, decoding.**

31

## Gaze dynamics of feature-based inhibition

### 32 **Introduction**

33 To process the rich and fast-changing visual input, human needs to efficiently assign the  
34 limited attentional resource to task-relevant stimuli. Target cues have been proven to be  
35 beneficial in promoting target selection (Posner, 1980; Vickery, King, & Jiang, 2005; Wolfe,  
36 1994). However, whether prior knowledge of distractors (i.e., distractor cues) can help us to  
37 avoid unnecessary attention allocation to task-irrelevant information and facilitate performance  
38 is still an issue under debate. Divergent findings have been reported regarding whether  
39 distractor cues can accelerate search efficiency (Arita, Carlisle, & Woodman, 2012; Beck &  
40 Hollingworth, 2015; Becker, Hemsteger, & Peltier, 2015; Olivers, 2009; Soto, Heinke,  
41 Humphreys, & Blanco, 2005; Geoffrey F Woodman & Luck, 2007). Among the studies that  
42 showed behavioral promotions, the emergence of suppression benefits seemed to be dependent  
43 on multiple factors (Conci, Deichsel, Müller, & Töllner, 2019; Han & Kim, 2009; Stilwell &  
44 Vecera, 2019; Tanda & Kawahara, 2019; Töllner, Conci, & Müller, 2015), especially the  
45 constancy of distractor cues across trials so as to form expectations (Cunningham & Egeth,  
46 2016; Gaspelin, Leonard, & Luck, 2015; Gaspelin & Luck, 2018a; Vatterott & Vecera, 2012;  
47 Wen, Hou, & Li, 2018, for reviews, see Gaspelin & Luck, 2018b, 2019; Noonan, Crittenden,  
48 Jensen, & Stokes, 2018; van Moorselaar & Slagter, 2020).

49 Despite the increasing number of studies on whether the distractors can be efficiently  
50 inhibited, the question of how do we filter out them remains untangled. Researchers have  
51 proposed two possible mechanisms: proactive vs. reactive suppression (Geng, 2014)  
52 Supporting evidence has been observed for both mechanisms. Some studies found that  
53 rejection templates would be created based on the foreknowledge of distractors and proactively  
54 guide our attention away from matched stimuli (Woodman, Carlisle, & Reinhart, 2013;  
55 Woodman & Luck, 2007). For example, a salient color-singleton distractor can be proactively  
56 inhibited and letters inside of the singleton distractor were less likely to be reported (Gaspelin

## Gaze dynamics of feature-based inhibition

57 et al., 2015). Moreover, an eye-tracking study showed that fewer gazes were directed to the  
58 color-singleton distractor than other search items (an oculomotor suppression effect) and this  
59 occurred even when the eye movements were initiated relatively quick, indicating that salient  
60 items can be proactively suppressed (Gaspelin, Leonard, & Luck, 2017). Event-related-  
61 potential (ERP) evidence demonstrated that salient distractors evoked the Pd component to  
62 intervene in the automatic capture (Gaspar & McDonald, 2014; Sawaki & Luck, 2011). Hence,  
63 the *signal suppression hypothesis* suggested that the suppression of the salient item occurs  
64 before the initial capture (Gaspelin & Luck, 2018b; Sawaki & Luck, 2011).

65 On the contrary, some researchers contended that distractor suppression is a reactive  
66 process and suppression cannot occur unless the distractor has been attended to. For instance,  
67 Moher and Egeth (2012) provided distractor cues before the search array and participants were  
68 slower in the negative-cue condition than in the neutral condition. By manipulating the stimulus  
69 onset asynchrony (SOA), they found the trend of avoidance in long SOA trials. Hence, they  
70 proposed the *search and destroy* process where attention is biased toward matched distractors  
71 and then rejected given sufficient time. This reactive inhibition hypothesis echoed the literature  
72 that proposed the mechanism of rapid disengagement (Awh, Belopolsky, & Theeuwes, 2012;  
73 Theeuwes, 2010). Liesefeld and colleagues (2017) further examined the temporal dynamics  
74 of Pd and N2pc evoked by the distractor and target to demonstrate the disengagement from the  
75 misallocated attention to the salient distractor and re-direction of attention to the target.

76 Critically, the majority of the existing studies changed the distractor feature from trial to  
77 trial, which hampered the establishment of stable inhibition templates through learning. Recent  
78 findings seemed to reach the consensus that the ability to inhibit distractors can be learned  
79 (Gaspelin & Luck, 2019; Geng, Won, & Carlisle, 2019) when the distractor feature remained  
80 constant or when the distractor locations were statistically manipulated (Wang & Theeuwes,  
81 2018). Under such arrangements, the initial capture would disappear and the rejection benefit

## Gaze dynamics of feature-based inhibition

82 would emerge gradually along with blocks (Cunningham & Egeth, 2016; Stilwell & Vecera,  
83 2019; Vatterott & Vecera, 2012).

84 Most of the above-mentioned studies used a visual search paradigm where items were  
85 spatially separated. Although the participants were informed of the distractor feature using the  
86 distractor cue, they would transform the feature cue into a spatial filter so as to suppress the  
87 matched items. One dominant discrepancy between feature-based attention and spatial  
88 attention is that feature-based attention does not rely on specific locations. Thus, common  
89 oculomotor events, such as fixation, dwell time and first saccades, which are location-based,  
90 are not effective indicators of attentional allocation for features that are spatially inseparable.  
91 To unequivocally reveal how distractor inhibition evolves over the course of a trial, we need a  
92 finer-scale measurement that can provide continuous information about attentional deployment  
93 at a millisecond level.

94 In the present study, we aimed to investigate the role of prior information in feature-based  
95 attentional inhibition. To avoid the confounding factors that are related to spatial attention, we  
96 used moving dots stimuli that were intermingled and spatially inseparable. Participants were  
97 asked to fixate at the center of the stimuli and their eye positions were recorded during the task.  
98 In the task, participants were instructed to detect speed change in one of the two moving  
99 directions. Previous literature has suggested that small fixational gaze shifts could reflect  
100 covert attention to external stimuli (Engbert & Kliegl, 2003; Hafed & Clark, 2002) or internal  
101 attentional selection inside working memory (van Ede, Chekroud, & Nobre, 2019). These  
102 attributes make small gaze shift an ideal measurement of attention for the stimuli and task used  
103 in the present study. Specifically, we examined the gaze positions using a decoding approach  
104 to inform the temporal dynamics of attentional deployment when participants received target  
105 cues (Experiment 1), distractor cues (Experiment 2), and repeated distractor cues (Experiment  
106 3).

## Gaze dynamics of feature-based inhibition

### 107 **Experiment 1**

#### 108 **Participants**

109 Eighteen participants were recruited in Experiment 1 and were paid for their participation.

110 All participants (including those in Experiments 2 and 3) had a normal or corrected-to-normal  
111 vision and had no history of psychiatric or neurological disorders. They (including participants  
112 in Experiments 2 and 3) provided written informed consent prior to the experiment.

113 One participant's eye data was missing due to technical failure. One participant showed  
114 extremely bad performance (detection sensitivity was more than 1.5 SD below the mean and  
115 response time was 3 SD beyond the mean). These two participants were excluded from the  
116 analysis. The final sample consisted of sixteen participants (mean age = 21.3, range from 19 to  
117 26, 5 males, all right-handed). The study was approved by the local ethics committee at Peking  
118 University.

#### 119 **Method**

120 The stimuli were presented using MATLAB (Mathworks, Natick, MA, USA) with  
121 Psychtoolbox3 extensions (Brainard, 1997) and were displayed on a LED monitor (refresh rate:  
122 100Hz, resolution: 2560×1440) with a viewing distance about 80 cm. As shown in Fig. 1A,  
123 each trial began with a cue indicating the moving direction of the target dots. The cue was  
124 presented for 0.3s. During the delay period, a set of dots ( $N = 260$ ,  $0.12^\circ \times 0.12^\circ$ , speed = 3  
125 deg/s, lifetime = 0.1s) appeared in an aperture (outer circle diameter =  $20^\circ$ , inner circle diameter  
126 =  $8^\circ$ ) centered at the fixation cross ( $0.4^\circ$ ) and moved randomly for 0.6s. Once the grey fixation  
127 cross changed into green, the dots started to move coherently (coherence level = 0.8) toward  
128 two different directions. Dots in the target direction (target dots,  $N = 130$ ) would move toward  
129 the cued direction while the distractor dots would move toward another direction. The  
130 directions were randomly and independently selected from eight direction bins which covered  
131 the whole circle. It was possible that the moving directions of target dots and distractor dots

## Gaze dynamics of feature-based inhibition

132 belonged to the same direction bin but the minimal difference must be above 15°. In half of the  
133 trials, the speed of the target dots would increase (two times upon the speed) and the increment  
134 lasted for 0.3s. The speed-up might start at any time from 0.3~1.3s after the onset of the central  
135 green fixation. Participants were asked to detect the speed-up and respond whenever it  
136 happened. The moving dots disappeared immediately after the response. For the no-change  
137 trials, coherent moving would be displayed for 1.5s. Participants completed 16 blocks of 80  
138 trials and they received feedback about their performance at the end of each block.

139 Eyelink 1000 Plus (SR Research) was used to record the binocular movements with a  
140 sample rate of 500Hz. At the beginning of each block, the eye tracker was calibrated using a  
141 five-point calibration procedure. Participants were asked to fixate at the central fixation cross  
142 and avoid tracking the moving dots during the whole experiment. Their heads were stabilized  
143 using a chin-rest.

### 144 **Data analysis**

145 *Behavior.* To compute the detection sensitivity ( $d'$ ), we took trials in which responses  
146 were later than the speed change onset as hit. Standard corrections were performed to deal with  
147 hit rate of 1 or false alarm rate of 0 (Macmillan & Kaplan, 1985). Reaction time was measured  
148 as the time between the speed change onset and the response. Mean RT was obtained from hit  
149 trials.

150 *Decoding.* We carried out the decoding analysis using the correct-rejection trials. Eye  
151 blinks were spline-interpolated (van Ede et al., 2019). Given that the gaze position of the left  
152 and right eye should be highly correlated, we averaged the binocular data and obtained the two-  
153 dimensional data representing the raw horizontal and vertical gaze positions. We epoched the  
154 continuous data -0.3~2.4s time-locked to the cue onset and baseline-corrected to the mean of -  
155 0.3~0s before cue onset. Finally, we smoothed the time-series data using a Gaussian kernel  
156 (standard deviation = 4ms). Decoding was performed on each time point based on the

## Gaze dynamics of feature-based inhibition

157 Mahalanobis distance in a leave-one-out manner. Trials were randomly partitioned into 7  
158 training-folds and 1 test-fold. To create an unbiased training set, the number of trials from each  
159 direction bin was equalized by subsampling. The subsampled trials of each direction bin were  
160 averaged and convolved with a half cosine basis set raised to the 7th power. The covariance  
161 matrix was estimated based on the convolved training set. The Mahalanobis distances were  
162 computed between each trial of the test set and the averaged basis-weighted training set. After  
163 obtaining the Mahalanobis distances, we mean-centered them across the eight directions. The  
164 distances to the eight directions were regarded as the ‘tuning curve’. By computing the cosine  
165 vector mean of the tuning curve, we obtained the ‘decoding accuracy’, where a more positive  
166 value suggests a higher pattern similarity between similar directions than between dissimilar  
167 directions (Wolff, Jochim, Akyürek, & Stokes, 2017). This process was repeated for 1000 times.  
168 The averaged results for each trial was used for the statistical test. The significance of decoding  
169 was assessed by comparing whether the decoding accuracy was different from zero. Cluster-  
170 based permutation was performed on the decoding accuracy time-series over participants  
171 ( $\alpha = 0.05$ , cluster-based nonparametric  $\alpha = 0.05$ , cluster statistic = sum, two-tail,  
172 permutation times = 10000, Maris & Oostenveld, 2007).

## 173 **Results**

174 As shown in Fig.1B, the speed-change detection performance was good when the target  
175 cue was presented ( $d' = 2.9 \pm 1.1$ ,  $RT = 460 \pm 28$ ms). There was a trend of gaze shift towards  
176 the cued direction after the cue onset, during the delay and coherent moving period (see the  
177 gaze heatmap in Supplementary Fig. 1). To reveal the temporal characteristics of the feature-  
178 based gaze bias, we performed the Mahalanobis decoding on the gaze position data.  
179 Participants’ attention was biased toward the cued direction and this bias lasted during the  
180 entire delay period and further increased once the coherent moving started (Fig1.C, clustered  
181  $p < .001$ ,  $0.164 \sim 2.4$ s). By contrast, little information about the distractor dots was obtained



## Gaze dynamics of feature-based inhibition

182 from the gaze data. These results were in agreement with the gaze heatmap which together  
183 suggested that gaze decoding can reveal the bias in attentional selection in the current  
184 feature-based task. Therefore, we examined the ocular dynamics under feature-based  
185 attentional inhibition with gaze decoding in Experiment 2.  
186

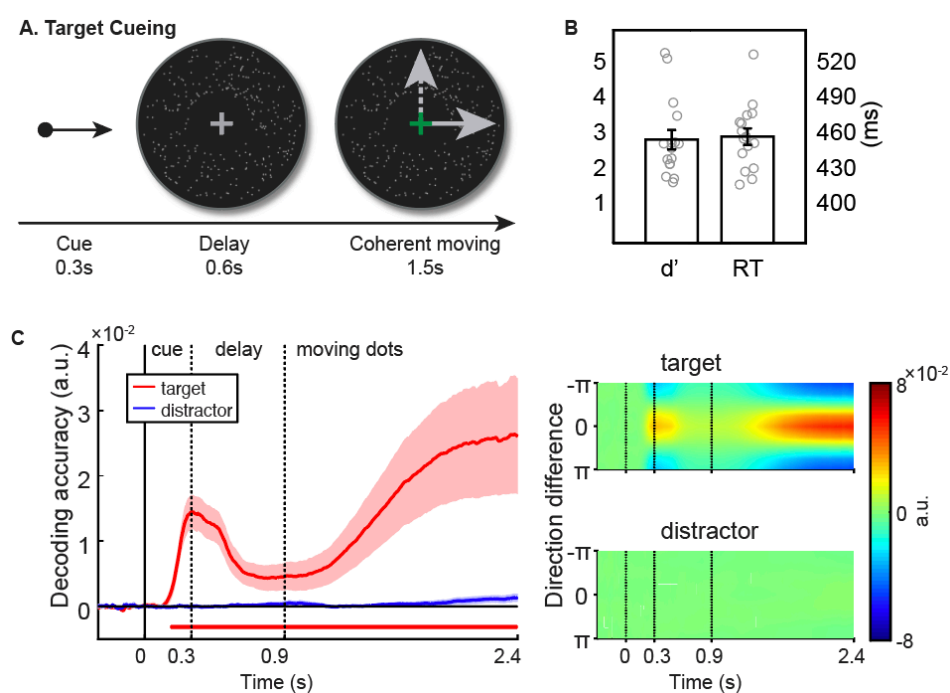

187 **Figure 1. Task and results of Experiment 1.** (A) Task. The cue indicated the moving direction  
188 of the target dots. All dots moved randomly during the delay. Participants need to detect the  
189 speed change of target dots during the coherent moving period. The solid/dashed arrow  
190 represents the moving direction of the target/distractor dots which were plotted for illustrations.  
191 (B) Behavioral performance. Error bars represented standard errors of the mean. Each circle  
192 dot represented one participant. (C) Direction decoding using gaze positions. The left panel  
193 was the time series of decoding accuracy. Shaded errorbar was the standard deviation of mean  
194 derived from 5,000 bootstrapped samples. Solid lines below the x-axis are the cluster-permuted  
195 significant time intervals. The right panel was the tuning curve of the averaged eight directions  
196 for the target and distractor direction at each timepoint. The tuning curve was the mean-  
197 centered and sign-reversed Mahalanobis distance between patterns to all moving directions.

## Gaze dynamics of feature-based inhibition

### 198 **Experiment 2**

#### 199 **Participants**

200 According to an estimation from G-power (Faul, Erdfelder, Lang, & Buchner, 2007),  
201 twenty-seven participants were supposed to be collected assuming a medium effect size ( $d =$   
202  $0.5$ ) and a high statistic power (80%) for a one-tail paired sample T-Test ( $\alpha = 0.05$ ). We  
203 tested twenty-seven participants in total and two participants were excluded as their  
204 performances were outliers to the sample (their  $d'$  and RT were more than 2.5 SD beyond the  
205 mean). Twenty-five participants were included for the analysis (mean age = 21.7, range from  
206 18 to 26, 8 males, all right-handed).

#### 207 **Method**

208 The general procedures were similar between Experiment 1 and Experiment 2. There were  
209 two conditions in Experiment 2. In the distractor-cueing condition, the cue indicated the  
210 moving direction of distractor dots. In the neutral condition, the cue was uninformative as  
211 neither the target dots nor the distractor dots would move towards the cued direction (see Fig.  
212 2A). Since participants had no idea which group of dots would have the speed change in the  
213 neutral condition, they should attend both directions equally. Each condition had eight blocks  
214 of eighty trials and the blocks of the two conditions were randomly interleaved. Participants  
215 were informed of the cueing condition at the beginning of each block. There was a quiz at the  
216 end of the block asking participants to report which cueing condition they had performed. The  
217 overall accuracy was 97.5% suggesting that participants were aware of the cueing condition  
218 for each block.

#### 219 **Data analysis**

220 To examine whether distractor-cueing would benefit participants' behavioral performance,  
221 the non-parametric permutation test (iteration = 100000) was performed on  $d'$  and the averaged  
222 RTs of the two conditions. Direction decoding in the distractor cueing condition was similar to

## Gaze dynamics of feature-based inhibition

223 what we performed in Experiment 1. Because we had fewer trials for each direction bin, we  
224 partitioned the data into six-folds for the leave-one-out cross-validation. As for the decoding  
225 in neutral cueing condition, we arbitrarily labeled one direction as “ori1” and the other as “ori2”  
226 in each trial and performed decoding separately so that the decoding performance between the  
227 distractor and neutral condition would not be affected by the amount of trials. However, the  
228 statistical test was performed on the averaged decoding accuracy of the two directions.

### 229 **Results**

230 There was no significant difference between distractor-cueing and neutral cueing  
231 conditions in the detection sensitivity ( $M_{\text{dis}} = 2.2 \pm 1.0$ ,  $M_{\text{neu}} = 2.3 \pm 1.0$ ,  $t(24) = -1.066$ ,  $p = .759$ ,  
232 Cohen’s  $d = .062$ ) or RT ( $M_{\text{dis}} = 477 \pm 35\text{ms}$ ,  $M_{\text{neu}} = 471 \pm 36\text{ms}$ ,  $t(24) = 1.735$ ,  $p = .611$ , Cohen’s  
233  $d = .102$ ). However, participants demonstrated distinct ocular dynamics under these two  
234 conditions. In the distractor-cueing condition, participants’ attention was biased by the  
235 distractor cue as informed by the decoding accuracy and the bias remained even after the  
236 coherent moving onset (Fig. 2C, blue curve, 0.17~2.4s,  $p < .001$ ). In contrast, the target  
237 information gradually emerged until the late period of the coherent moving stage (Fig. 2C, red  
238 curve, 2.024~2.4s,  $p = .034$ ). In the neutral cueing condition, although there was an initial bias  
239 cause by the uninformative cue (Fig. 2D, black curve, 0.15~0.926s,  $p = .002$ ), participants  
240 disengaged from that direction and started to accumulate evidence for speed change at the two  
241 possible directions (Fig. 2D, green curve, 1.536~2.4s,  $p = .004$ ).

## Gaze dynamics of feature-based inhibition

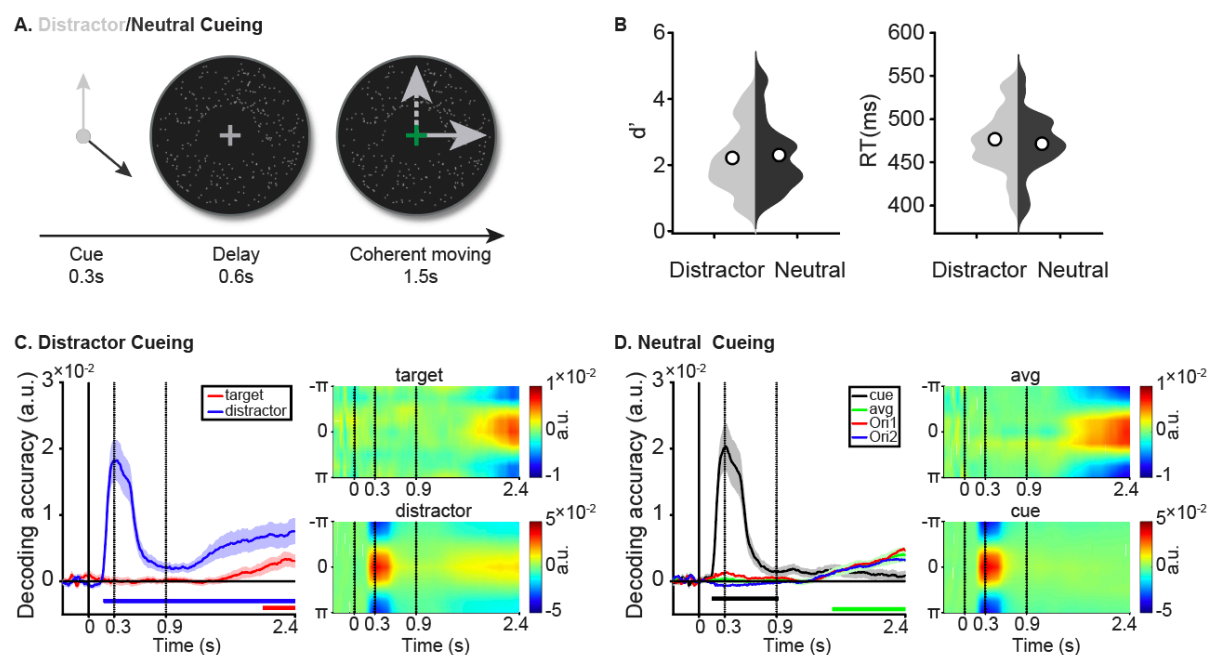

242

243 **Figure 2. Task and results of Experiment 2.** (A) Task. The cue in the distractor cueing

244 condition (light arrow) indicated moving direction of the distractor dots, whereas neither the

245 moving direction of the target dot nor the distractor dots will be informed by the cue (dark

246 arrow) in the neutral condition (i.e., uninformative cue). (B) Behavioral performance of the

247 two cueing conditions. Circles were the mean of all participants. (C) The direction decoding of

248 distractor cueing condition. Solid lines below the x-axis are the cluster-permuted significant

249 time intervals. (D) The direction decoding of neutral cueing condition. The green curve (avg)

250 was the average of the red (ori1) and the blue curve (ori2).

251

252

## Experiment 3

253 Previous literature has suggested that distractor inhibition can be learned with extended

254 practice. Suppression benefit would be found if the distractor feature remains the same

255 throughout the experiment (Cunningham & Egeth, 2016; Moher, Lakshmanan, Egeth, & Ewen,

256 2014). In Experiment 3, we planned to investigate how the consistency of the distractor features

257 affected the gaze dynamics.

## Gaze dynamics of feature-based inhibition

### 258 **Participants**

259 According to G-power (Faul et al., 2007), twenty-three participants were supposed to be  
260 collected to ensure a medium effect size ( $f = 0.25$ ) and a high statistic power (85%) for a  
261 repeated one-factor ANOVA ( $\alpha = 0.05$ ). Twenty-three participants (mean age = 21.9, range  
262 from 18 to 26, 12 males, all right-handed) were recruited for the experiment.

### 263 **Method**

264 Participants in Experiment 3 only completed the distractor cueing condition. However,  
265 instead of changing the distractor-cue every trial, we presented the same distractor cue across  
266 five consecutive trials. Target dots might change their moving directions in each trial.  
267 Participants performed 16 blocks and each block contained 80 trials.

### 268 **Data analysis**

269 Repeated ANOVAs were performed on the  $d'$  and RT to examine the behavioral  
270 difference across five repetitions. We first performed the decoding analysis on each repetition.  
271 The baseline correction was performed on each repetition separately to the mean of the pre-  
272 stimulus interval (-0.3~0s) of the repetition. Because we had fewer trials for each direction bin,  
273 the data was partitioned into five folds for the leave-one-out cross-validation. To reveal how  
274 expectations of the distractor direction modulated gazes, we performed the cross-repetition  
275 decoding. Five consecutive trials were baseline corrected to -0.3~0s of the first trial. Trials at  
276 each repetition were partitioned into five folds. We took the four folds of trials from each  
277 repetition to train a common classifier and then tested the remaining one-fold of trials from  
278 each repetition. This process was iterated for 1000 times.

279 To examine how repetition changed the decoding accuracy of target and distractor  
280 directions, we drew a best-fit line to account for the trend of mean decoding accuracies across  
281 five repetitions for each participant. Populations' best-fit line slopes were tested against 0 using

## Gaze dynamics of feature-based inhibition

282 one-sample t-test (two-tailed,  $\alpha = .05$ ). A significant positive/negative t-value indicated  
283 that the decoding accuracy increased/decreased along with each repetition.

### 284 **Results**

285 There were no significant differences among the five consecutive trials on  $d'$  ( $F(4,88)$   
286  $=0.914$ ,  $p = .460$ ,  $\eta_p^2 = .040$ ) or RT ( $F(4,88) = 0.861$ ,  $p = .491$ ,  $\eta_p^2 = .038$ ). We speculated that  
287 the lack of the expected suppression benefits might be due to the relatively fewer repetitions in  
288 the current study compared with previous literature (e.g., Cunningham & Egeth, 2016; van  
289 Moorselaar & Slagter, 2019; Vatterott & Vecera, 2012; Wen et al., 2018).

290 Next, we investigated how repetitions of the distractor cue modulated the information  
291 about the target and distractor contained in the gaze positions. In terms of the averaged target  
292 direction decoding accuracy during the coherent moving stage, slopes of the best-fit lines were  
293 not statistically different from 0 (Fig.3B,  $t(22) = -0.15$ ,  $p = .885$ ,  $CI_{95} = [-.0011, .0009]$ ).  
294 However, slopes of the best-fit lines for the decoding accuracy of distractor direction were  
295 marginally significant negative (Fig. 3C,  $t(22) = -2.01$ ,  $p = .057$ ,  $CI_{95} = [-.0031, 0]$ ). Moreover,  
296 the averaged decoding accuracy between 0.3 to 2.4s of the fifth trial was smaller than the first  
297 trial ( $t(44) = 2.097$ ,  $p = .021$ , one-tailed,  $\alpha = .05$ ).

298 To demonstrated how the participants prepared the distractor inhibition under a predictive  
299 context, the cross-repetition decoding was conducted. The decoding accuracy of the pre-  
300 stimulus interval increased along with the repetition (Fig.3D,  $t(22) = 3.56$ ,  $p < .001$ ,  $CI_{95} =$   
301  $[.0003, .0011]$ ). The reconstruction of the distractor direction in the fifth trial was larger than  
302 the first trial ( $t(44) = 3.009$ ,  $p = .002$ , one-tailed,  $\alpha = .05$ ). This result suggested that, as the  
303 number of repetitions of the distractor cue increased, participants shifted their attention to the  
304 fixed distractor direction in advance before the start of the trials.

## Gaze dynamics of feature-based inhibition

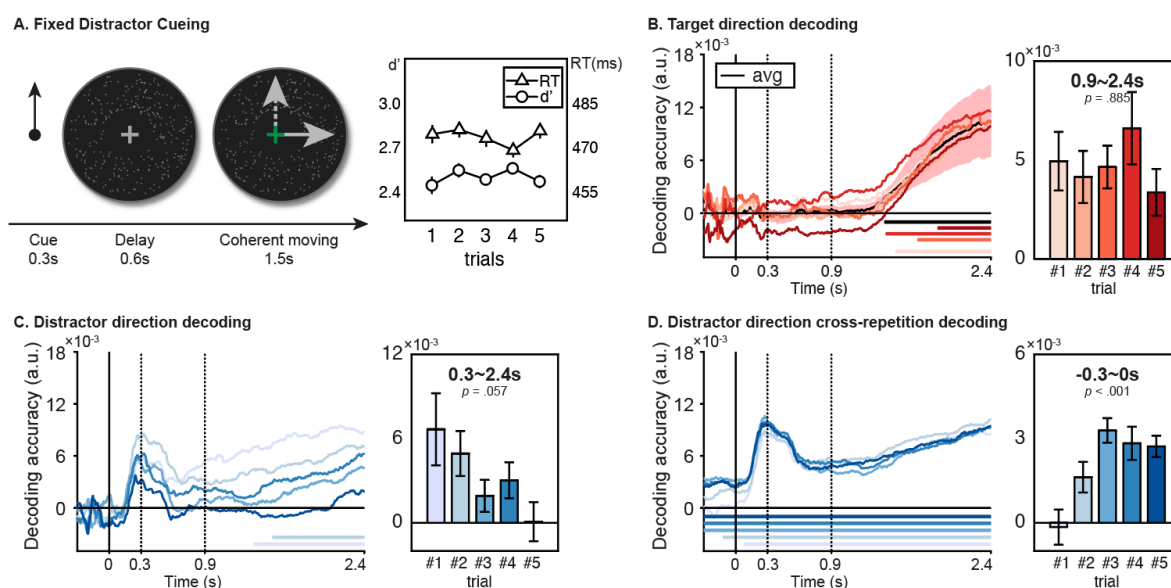

305

306 **Figure 3. Task and results of Experiment 3.** (A) Task and behavioral results. The cue  
 307 indicated the moving direction of the distractor dots which remained unchanged in five  
 308 consecutive trials. The dashed arrow in the coherent moving stage represented the moving  
 309 direction of distractor dots while the solid arrow represented the target direction. The right  
 310 panel showed the performance for speed-up detection. The errorbar represented the between-  
 311 subject standard error. (B) Decoding of target direction for each trial repetition. The black  
 312 curve is the averaged decoding accuracy across five repetitions. The solid lines below the x-  
 313 axis indicate significant temporal clusters (trial 1, 1.506~2.4s,  $p = .007$ ; trial 3, 1.712~2.4s,  $p$   
 314 = .014; trial 4, 1.412~2.4s,  $p = .009$ ; trial 5, 1.906~2.4s,  $p = .035$ ; average, 1.398~2.4s,  $p$   
 315 = .003). The right panel is the averaged decoding accuracy during the coherent moving stage  
 316 (0.9~2.4s). Error bars represent within-subject standard errors. (C) Decoding of distractor  
 317 direction for each trial repetition. Solid lines at the bottom represent the time intervals of  
 318 significant clusters (trial 1, 1.344~2.4s,  $p = .012$ ; trial 2, 1.52~2.4s,  $p = .024$ ). The right panel  
 319 shows the averaged decoding accuracy of distractor direction within the time window  
 320 0.3~2.4s. The  $p$ -value suggested that the population's slopes of the best-fit line were  
 321 marginally significant negative. (D) Cross-repetition decoding the distractor direction. (trial

## Gaze dynamics of feature-based inhibition

322 1, 0.058~2.4s,  $p < .001$ ; trial 2 -0.12~2.4s,  $p = .003$ ; trial 3~5, -0.3~2.4s,  $p < .001$ ). The right  
323 panel is the averaged decoding accuracy of the pre-stimulus interval (-0.3~0s). The  $p$ -value  
324 suggested that the population's slopes of the best-fit line were significantly positive. See  
325 Supplementary Fig. S2-S4 for detailed decoding results at each repetition.

326

327

## Discussion

328 Distractor inhibition is challenging and context-dependent. Mixed results have been  
329 reported concerning whether distractors matched with the distractor cue could be efficiently  
330 suppressed. The current study investigated small gaze shifts in feature-based attentional control  
331 that could benefit from the inhibition of distractors in various cueing contingences and  
332 predictive contexts. Experiment 1 demonstrated that attention was biased toward the moving  
333 direction of the target dots and this bias could be quantitatively measured through the decoding  
334 of gaze positions. In Experiment 2, participants were cued to the distractor's moving direction  
335 and the results showed that participants' attention was biased toward the cued distractor  
336 direction, as evidenced by decoded information from gaze positions. After being repeatedly  
337 cued to the same distractor direction in Experiment 3, participants strategically shifted their  
338 attention towards that direction preceding the cue onset and gradually suppress further bias  
339 towards the distractor's direction during the coherent moving stage.

340 In Experiment 2 where the distractor's direction alternated on a trial-by-trial basis,  
341 participants' attention was biased by the distractor cue and this bias lingered throughout the  
342 delay and coherent moving period. The sustained distractor information decoded from the gaze  
343 positions during the coherent moving stage suggested that distractor dots were still being  
344 attended and monitored. By contrast, cue-induced bias was quickly overcome in the neutral  
345 condition. Beck and colleagues (2018) examined the eye movement under the distractor cueing  
346 condition using a visual search task. They found that the first eye movement was



## Gaze dynamics of feature-based inhibition

347 biased towards the items that matched the to-be-ignored color cue but subsequent fixations  
348 were biased away from them. They further argued that configure an online feature-based  
349 negative template in a trial-by-trial manner is almost impossible and behavioral benefits of  
350 distractor cues emerge on condition that the later avoidance offsets the cost of early capture.  
351 Instead of measuring conventional ocular events (e.g., fixation and saccade), we performed  
352 direction decoding on the gaze positions to reveal the dynamics of feature-based distractor  
353 processing. Our results did not show the *later avoidance* as reported in Beck et al (2018) or the  
354 destroy component of the *search and destroy* process that was proposed by Moher and Egeth  
355 (2012). We conjectured that this discrepancy might be related to stimuli property and paradigm  
356 setting used in the present study. In a visual search task (Beck et al., 2018; Moher & Egeth,  
357 2012), disengagement from the distractor location is the prerequisite to identify the target if the  
358 distractor captures attention. However, in the speed detection task used in the present study,  
359 the spatially intermingled moving dots of the target and distractor directions induced  
360 interference that was unlikely to be resolved by redirecting spatial attention. This interference  
361 occurred throughout the coherent moving stage, suggesting that sustained inhibition of the  
362 distractor direction could benefit the speed change detection in the target direction. Indeed, it  
363 has been suggested that distractors cannot be ignored before being selected in visual search  
364 (Donohue, Bartsch, Heinze, Schoenfeld, & Hopf, 2018). The decoding results in the distractor  
365 cueing condition demonstrated that monitoring the distractor direction while attending to the  
366 target direction serves as a means to reduce the between-direction interference.

367 In Experiment 3, when the distractor cue repeated in consecutive trials, the gaze dynamics  
368 manifested a functional dissociation at different stages. During the preparation, participants  
369 showed increased attention bias toward the distractor direction along with each repetition.  
370 Previous work showed that expectations could pre-activate the stimulus template (Blom,  
371 Feuerriegel, Johnson, Bode, & Hogendoorn, 2020; Kok, Mostert, & de Lange, 2017). Our

## Gaze dynamics of feature-based inhibition

372 results resonated with these findings and indicated that expectations could modulate gaze  
373 positions even before the trial started (see Fig. 3D). As a result of this strategical gaze-related  
374 attention shift, trial-wise re-deployment of attention to the distractor direction was not  
375 necessary as evidenced by the systematically deteriorated decoding performance during the  
376 coherent moving stage (see Fig. 3C). In van Moorselaar and Slagter (2019), they presented the  
377 distractor at the same place across trials to induce expectations about the upcoming distractor  
378 location. Their results suggested that expectations modulated distractor processing in a reactive  
379 manner as reflected by the smaller Pd component evoked by the distractor and lower decoding  
380 accuracy of the distractor location in the forth repeated trial relative to the initial trial. Indeed,  
381 we also found reduced reactive distractor inhibition as the repetition increased. Given the fixed  
382 distractor cue across consecutive five trials, our participants learned to shift their attention to  
383 the distractor's direction proceeding the trial onset so as to avoid reactive processing of the  
384 distractor. Yet, they could still monitor the distractor with minimal attentional resources after  
385 stimulus onset. Taken together, the results of Experiment 3 suggested that predictive context  
386 facilitates distractor inhibition by strategically maintaining early attentional bias and reducing  
387 later switch costs for the monitoring process.

388       Instead of defining ocular events, we capitalized on the raw gaze positions to explore the  
389 real-time attentional bias in the present study. Because the participants were instructed to fixate  
390 at the central fixation cross and try to avoid tracking of the moving dots, the recorded data is  
391 treated as fixational eye movements. The fixational eye movement can be categorized as slow  
392 drift, microtremor, and microsaccades (Alexander & Martinez-Conde, 2019; Martinez-Conde,  
393 Macknik, & Hubel, 2004; Rucci & Poletti, 2015). The microsaccade has been regarded as an  
394 overt measure of covert attention while the slow drift is often assumed to random motions of  
395 the eye attempting to maintain visual fixations. However, one recent study suggested that the  
396 slow drift manifested stimulus-driven modulation in speed and direction (Malevich, Buonocore,

## Gaze dynamics of feature-based inhibition

397 & Hafed, 2020) and the changes in drift were behavior-relevant (Intoy & Rucci, 2020). We did  
398 not distinguish these two ocular events and performed direction decoding using the raw gaze  
399 data. This approach has been adopted by a recent study that showed that small gaze bias can  
400 reflect internal attention shifts in working memory (van Ede et al., 2019). Our results further  
401 demonstrate that the processes of feature-based attentional selection and inhibition could also  
402 be read-out from these small gaze shifts.

403 To conclude, we performed gaze decoding to reveal the dynamic process of feature-based  
404 attentional control. In the target cueing condition, tracking of the target direction was dominant  
405 and preserved to the end of the trial, whereas little information about the distractor could be  
406 read-out from the gaze positions. In the distractor cueing condition, distractor inhibition  
407 required constant monitoring of its direction, and this process was modulated by expectation.  
408 Expectations would promote distractor inhibition by biasing the gaze-related attention to the  
409 distractor's direction in the preparatory stage and decreasing the cost of re-deployment of  
410 attention for distractor monitoring.

411

### 412 **Author Contributions**

413 Wen Wen (Wen) developed the study concept and experimental design. Testing and data  
414 collection were performed by Wen and Yangming Zhang (Zhang). Wen performed the data  
415 analysis and interpretation under the supervision of Sheng Li (Li). Wen drafted the  
416 manuscript, and Li provided critical revisions. All authors approved the final version of the  
417 manuscript for submission.

418

419

## Gaze dynamics of feature-based inhibition

420

### References

- 421 Alexander, R. G., & Martinez-Conde, S. (2019). Fixational Eye Movements. In C. Klein & U. Ettinger  
422 (Eds.), *Eye Movement Research: An Introduction to its Scientific Foundations and Applications*  
423 (pp. 73–115). [https://doi.org/10.1007/978-3-030-20085-5\\_3](https://doi.org/10.1007/978-3-030-20085-5_3)
- 424 Arita, J. T., Carlisle, N. B., & Woodman, G. F. (2012). Templates for rejection: configuring attention  
425 to ignore task-irrelevant features. *Journal of Experimental Psychology: Human Perception and*  
426 *Performance*, 38(3), 580.
- 427 Awh, E., Belopolsky, A. V., & Theeuwes, J. (2012). Top-down versus bottom-up attentional control:  
428 A failed theoretical dichotomy. *Trends in Cognitive Sciences*, 16(8), 437–443.
- 429 Beck, V. M., & Hollingworth, A. (2015). Evidence for negative feature guidance in visual search is  
430 explained by spatial recoding. *Journal of Experimental Psychology: Human Perception and*  
431 *Performance*, 41(5), 1190–1196. <https://doi.org/10.1037/xhp0000109>
- 432 Beck, V. M., Luck, S. J., & Hollingworth, A. (2018). Whatever you do, don't look at the. .: Evaluating  
433 guidance by an exclusionary attentional template. *Journal of Experimental Psychology: Human*  
434 *Perception and Performance*, 44(4), 645–662. <https://doi.org/10.1037/xhp0000485>
- 435 Becker, M. W., Hemsteger, S., & Peltier, C. (2015). No templates for rejection: A failure to configure  
436 attention to ignore task-irrelevant features. *Visual Cognition*, 23(9–10), 1150–1167.  
437 <https://doi.org/10.1080/13506285.2016.1149532>
- 438 Blom, T., Feuerriegel, D., Johnson, P., Bode, S., & Hogendoorn, H. (2020). Predictions drive neural  
439 representations of visual events ahead of incoming sensory information. *Proceedings of the*  
440 *National Academy of Sciences of the United States of America*, 117(13), 7510–7515.  
441 <https://doi.org/10.1073/pnas.1917777117>
- 442 Brainard, D. H. (1997). The psychophysics toolbox. *Spatial Vision*, 10(4), 433–436.
- 443 Conci, M., Deichsel, C., Müller, H. J., & Töllner, T. (2019). Feature guidance by negative attentional  
444 templates depends on search difficulty. *Visual Cognition*, 0(0), 1–10.  
445 <https://doi.org/10.1080/13506285.2019.1581316>
- 446 Cunningham, C. A., & Egeth, H. E. (2016). Taming the White Bear: Initial Costs and Eventual Benefits  
447 of Distractor Inhibition. *Psychological Science*, 27(4), 476–485.  
448 <https://doi.org/10.1177/0956797615626564>
- 449 Donohue, S. E., Bartsch, M. V., Heinze, H.-J., Schoenfeld, M. A., & Hopf, J.-M. (2018). Cortical  
450 Mechanisms of Prioritizing Selection for Rejection in Visual Search. *The Journal of Neuroscience*,  
451 38(20), 4738–4748. <https://doi.org/10.1523/jneurosci.2407-17.2018>
- 452 Engbert, R., & Kliegl, R. (2003). Microsaccades uncover the orientation of covert attention. *Vision*  
453 *Research*, 43(9), 1035–1045.
- 454 Faul, F., Erdfelder, E., Lang, A.-G., & Buchner, A. (2007). G\* Power 3: A flexible statistical power  
455 analysis program for the social, behavioral, and biomedical sciences. *Behavior Research Methods*,  
456 39(2), 175–191.
- 457 Gaspar, J. M., & McDonald, J. J. (2014). Suppression of Salient Objects Prevents Distraction in Visual  
458 Search. *Journal of Neuroscience*, 34(16), 5658–5666. [https://doi.org/10.1523/jneurosci.4161-](https://doi.org/10.1523/jneurosci.4161-13.2014)  
459 13.2014
- 460 Gaspelin, N., Leonard, C. J., & Luck, S. J. (2015). Direct Evidence for Active Suppression of Salient-  
461 but-Irrelevant Sensory Inputs. *Psychological Science*, 26(11), 1740–1750.  
462 <https://doi.org/10.1177/0956797615597913>
- 463 Gaspelin, N., Leonard, C. J., & Luck, S. J. (2017). Suppression of overt attentional capture by salient-  
464 but-irrelevant color singletons. *Attention, Perception, and Psychophysics*, 79(1), 45–62.  
465 <https://doi.org/10.3758/s13414-016-1209-1>
- 466 Gaspelin, N., & Luck, S. J. (2018a). Distinguishing among potential mechanisms of singleton  
467 suppression. *Journal of Experimental Psychology: Human Perception and Performance*, 44(4),  
468 626–644. <https://doi.org/10.1037/xhp0000484>
- 469 Gaspelin, N., & Luck, S. J. (2018b). The Role of Inhibition in Avoiding Distraction by Salient Stimuli.  
470 *Trends in Cognitive Sciences*, 22(1), 79–92. <https://doi.org/10.1016/j.tics.2017.11.001>
- 471 Gaspelin, N., & Luck, S. J. (2019). Inhibition as a potential resolution to the attentional capture debate.  
472 *Current Opinion in Psychology*, 29, 12–18. <https://doi.org/10.1016/j.copsyc.2018.10.013>
- 473 Geng, J. J. (2014). Attentional Mechanisms of Distractor Suppression. *Current Directions in*

## Gaze dynamics of feature-based inhibition

- 474 *Psychological Science*, 23(2), 147–153. <https://doi.org/10.1177/0963721414525780>
- 475 Geng, J. J., Won, B. Y., & Carlisle, N. B. (2019). Distractor Ignoring: Strategies, Learning, and Passive  
476 Filtering. *Current Directions in Psychological Science*.  
477 <https://doi.org/10.1177/0963721419867099>
- 478 Hafed, Z. M., & Clark, J. J. (2002). Microsaccades as an overt measure of covert attention shifts. *Vision*  
479 *Research*, 42(22), 2533–2545.
- 480 Han, S. W., & Kim, M. S. (2009). Do the Contents of Working Memory Capture Attention? Yes, But  
481 Cognitive Control Matters. *Journal of Experimental Psychology: Human Perception and*  
482 *Performance*, 35(5), 1292–1302. <https://doi.org/10.1037/a0016452>
- 483 Intoy, J., & Rucci, M. (2020). Finely tuned eye movements enhance visual acuity. *Nature*  
484 *Communications*, 11(1), 1–11.
- 485 Kok, P., Mostert, P., & de Lange, F. P. (2017). Prior expectations induce prestimulus sensory templates.  
486 *Proceedings of the National Academy of Sciences*, 114(39), 10473–10478.  
487 <https://doi.org/10.1073/pnas.1705652114>
- 488 Liesefeld, H. R., Liesefeld, A. M., Töllner, T., & Müller, H. J. (2017). Attentional capture in visual  
489 search: Capture and post-capture dynamics revealed by EEG. *NeuroImage*, 156(January), 166–  
490 173. <https://doi.org/10.1016/j.neuroimage.2017.05.016>
- 491 Macmillan, N. A., & Kaplan, H. L. (1985). Detection theory analysis of group data: estimating  
492 sensitivity from average hit and false-alarm rates. *Psychological Bulletin*, 98(1), 185.
- 493 Malevich, T., Buonocore, A., & Hafed, Z. M. (2020). Rapid stimulus-driven modulation of slow ocular  
494 position drifts. *BioRxiv*.
- 495 Maris, E., & Oostenveld, R. (2007). Nonparametric statistical testing of EEG-and MEG-data. *Journal*  
496 *of Neuroscience Methods*, 164(1), 177–190.
- 497 Martinez-Conde, S., Macknik, S. L., & Hubel, D. H. (2004). The role of fixational eye movements in  
498 visual perception. *Nature Reviews Neuroscience*, 5(3), 229–240.
- 499 Moher, J., & Egeth, H. E. (2012). The ignoring paradox: Cueing distractor features leads first to  
500 selection, then to inhibition of to-be-ignored items. *Attention, Perception, and Psychophysics*,  
501 74(8), 1590–1605. <https://doi.org/10.3758/s13414-012-0358-0>
- 502 Moher, J., Lakshmanan, B. M., Egeth, H. E., & Ewen, J. B. (2014). Inhibition Drives Early Feature-  
503 Based Attention. *Psychological Science*, 25(2), 315–324.  
504 <https://doi.org/10.1177/0956797613511257>
- 505 Noonan, M. A. P., Crittenden, B. M., Jensen, O., & Stokes, M. G. (2018). Selective inhibition of  
506 distracting input. *Behavioural Brain Research*, 355(April), 36–47.  
507 <https://doi.org/10.1016/j.bbr.2017.10.010>
- 508 Olivers, C. N. L. (2009). What drives memory-driven attentional capture? The effects of memory type,  
509 display type, and search type. *Journal of Experimental Psychology: Human Perception and*  
510 *Performance*, 35(5), 1275.
- 511 Posner, M. I. (1980). Orienting of attention. *Quarterly Journal of Experimental Psychology*, 32(1), 3–  
512 25.
- 513 Rucci, M., & Poletti, M. (2015). Control and functions of fixational eye movements. *Annual Review*  
514 *of Vision Science*, 1, 499–518.
- 515 Sawaki, R., & Luck, S. J. (2011). Active suppression of distractors that match the contents of visual  
516 working memory. *Visual Cognition*, 19(7), 956–972.  
517 <https://doi.org/10.1080/13506285.2011.603709>
- 518 Soto, D., Heinke, D., Humphreys, G. W., & Blanco, M. J. (2005). Early, involuntary top-down  
519 guidance of attention from working memory. *Journal of Experimental Psychology: Human*  
520 *Perception and Performance*, 31(2), 248–261. <https://doi.org/10.1037/0096-1523.31.2.248>
- 521 Stilwell, B. T., & Vecera, S. P. (2019). Cued distractor rejection disrupts learned distractor rejection.  
522 *Visual Cognition*, 0(0), 1–16. <https://doi.org/10.1080/13506285.2018.1564808>
- 523 Tanda, T., & Kawahara, J. I. (2019). Association between cue lead time and template-for-rejection  
524 effect. *Attention, Perception & Psychophysics*.
- 525 Theeuwes, J. (2010). Top-down and bottom-up control of visual selection. *Acta Psychologica*, 135(2),  
526 77–99. <https://doi.org/10.1016/j.actpsy.2010.02.006>
- 527 Töllner, T., Conci, M., & Müller, H. J. (2015). Predictive distractor context facilitates attentional  
528 selection of high, but not intermediate and low, salience targets. *Human Brain Mapping*, 36(3),



## Gaze dynamics of feature-based inhibition

- 529 935–944.
- 530 van Ede, F., Chekroud, S. R., & Nobre, A. C. (2019). Human gaze tracks attentional focusing in  
531 memorized visual space. *Nature Human Behaviour*, 3(5), 462–470.  
532 <https://doi.org/10.1038/s41562-019-0549-y>
- 533 van Moorselaar, D., & Slagter, H. A. (2019). Learning What Is Irrelevant or Relevant: Expectations  
534 Facilitate Distractor Inhibition and Target Facilitation through Distinct Neural Mechanisms. *The*  
535 *Journal of Neuroscience: The Official Journal of the Society for Neuroscience*, 39(35), 6953–  
536 6967. <https://doi.org/10.1523/JNEUROSCI.0593-19.2019>
- 537 van Moorselaar, D., & Slagter, H. A. (2020). Inhibition in selective attention. *Annals of the New York*  
538 *Academy of Sciences*, 1464(1), 204.
- 539 Vatterott, D. B., & Vecera, S. P. (2012). Experience-dependent attentional tuning of distractor rejection.  
540 *Psychonomic Bulletin and Review*, 19(5), 871–878. <https://doi.org/10.3758/s13423-012-0280-4>
- 541 Vickery, T. J., King, L.-W., & Jiang, Y. (2005). Setting up the target template in visual search. *Journal*  
542 *of Vision*, 5(1), 8.
- 543 Wang, B., & Theeuwes, J. (2018). Statistical regularities modulate attentional capture. *Journal of*  
544 *Experimental Psychology. Human Perception and Performance*, 44(1), 13–17.  
545 <https://doi.org/10.1037/xhp0000472>
- 546 Wen, W., Hou, Y., & Li, S. (2018). Memory guidance in distractor suppression is governed by the  
547 availability of cognitive control. *Attention, Perception, & Psychophysics*, 80(5), 1157–1168.
- 548 Wolfe, J. M. (1994). Guided search 2.0 a revised model of visual search. *Psychonomic Bulletin &*  
549 *Review*, 1(2), 202–238.
- 550 Wolff, M. J., Jochim, J., Akyürek, E. G., & Stokes, M. G. (2017). Dynamic hidden states underlying  
551 working-memory-guided behavior. *Nature Neuroscience*, 20(6), 864–871.  
552 <https://doi.org/10.1038/nn.4546>
- 553 Woodman, G. F., Carlisle, N. B., & Reinhart, R. M. G. (2013). Where do we store the memory  
554 representations that guide attention? *Journal of Vision*, 13(3), 1–1. <https://doi.org/10.1167/13.3.1>
- 555 Woodman, Geoffrey F, & Luck, S. J. (2007). Do the contents of visual working memory automatically  
556 influence attentional selection during visual search? *Journal of Experimental Psychology: Human*  
557 *Perception and Performance*, 33(2), 363.
- 558
- 559
